# Supplementary material
Source: PubMed Central journal article supplement (PMC6945057)
Supplement: EMBR-21-e48741-s001.pdf [file EMBR-21-e48741-s001.pdf]

## **Table of Contents**

|                         |   |
|-------------------------|---|
| APPENDIX TABLE S1 ..... | 2 |
| APPENDIX TABLE S2 ..... | 3 |
| APPENDIX TABLE S3 ..... | 4 |
| APPENDIX TABLE S4 ..... | 6 |

**Appendix Table S1: Antibody Concentrations**

| Antibody        | Company        | Catalog No. | Western Blot | PLA   | IP         | ChIP / ChIP-seq | IHC   |
|-----------------|----------------|-------------|--------------|-------|------------|-----------------|-------|
| Actin           | Millipore      | MAB1501     | 1:10000      |       |            |                 |       |
| AIB1            | Cell Signaling | 2126        | 1:1000       | 1:100 | 1:100      | 1:50            |       |
| AIB1            | Cell Signaling | 2115        | 1:1000       | 1:100 |            |                 |       |
| ANCO1 (ANKRD11) | Abcam          | ab50852     | 1:50         | 1:50  |            | 5ug             |       |
| ANCO1 (ANKRD11) | Santa Cruz     | sc-81049    | 1:50         | 1:50  |            |                 | 1:50  |
| HA-Tag          | Cell Signaling | 2367        | 1:1000       |       |            |                 |       |
| Mouse HRP       | Amersham       | NA931-1ML   | 1:10000      |       |            |                 |       |
| myc tag         | Upstate        | 16-219      | 1:1000       |       |            |                 |       |
| pan-TEAD        | Cell Signaling | 13295       | 1:1000       |       | 1:100      |                 |       |
| p63             | Santa Cruz     | sc-8431     |              |       |            |                 | 1:400 |
| Rabbit HRP      | Cell Signaling | 7074        | 3.51388889   |       | 1:100      |                 |       |
| TEAD4           | Santa Cruz     | sc-101184   | 1:1000       |       | 0.11111111 | 5ug             |       |
| YAP             | Cell Signaling | 14074       | 1:1000       | 1:100 | 1:100      | 1:100           |       |
| YAP/TAZ         | Cell Signaling | 8418        | 1:1000       |       | 1:100      |                 |       |

**Appendix Table S2: qPCR/ChIP Primer Sequences**

| Name                        | Forward                     | Reverse                       |
|-----------------------------|-----------------------------|-------------------------------|
| AIB1                        | TCTTCGGTCTAATAGCATACCA      | GCCTGTGGCATCTGTGTTG           |
| ANKRD11                     | TTGATGAGGACGACGAGCAG        | TGACAGGATACGATGGGACG          |
| ANKRD45                     | GAAGAAGACATCGTTGGGAGA<br>AA | CCAAAGCTCTAATCACGTCCTT        |
| B2M                         | CTTAGCTGTGCTCGCGCTACTC<br>T | CCATTCTCTGCTGGATGACGTGA<br>GT |
| Control_promoter            | ACCAACACTCTTCCCTCAGC        | TTATTTTGGTTCAGGTGGTTGA        |
| CTGF                        | CAGCATGGACGTTTCGTCTG        | AACCACGGTTTGGTCCTTGG          |
| CTGF_promoter               | GCCAATGAGCTGAATGGAGT        | CAATCCGGTGTGAGTTGATG          |
| CYP4B1                      | GACGTTGGCTAAGGCTATGGA       | CTCCCCGTCTCCTGGATCTC          |
| CYR61                       | CTCGCCTTAGTCGTCACCC         | CGCCGAAGTTGCATTCCAG           |
| CYR61_Promoter              | AGGAGTGAGAGAAGCAAGCG        | TGCTTGTGAGCTTGTTCATCC         |
| GAPDH                       | CCCACATGGCCTCCAAGGAGT<br>A  | GTCTACATGGCAACTGTGAGGAG<br>G  |
| GH01J153606                 | AGGTTAGGGGCAGAGGCTAC        | CCCGCCTTAGGTAACGATGT          |
| IGFBP3                      | GTGGATCCCTCAACCAAGAA        | TAGGTTCCCAGAGTGCCCTA          |
| IL4R                        | ACACCAATGTCTCCGACTC         | TGTTGACTGCATAGGTGAGATGA       |
| ITGB2                       | AATGGAGTGACGCACAGGAA        | GAAGGTGATCGGGACATTGA          |
| KCNN4                       | CTGCTGCGTCTCTACCTGG         | AGGGTGCGTGTTTCATGTAAG         |
| PDLIM2                      | GCCCATCATGGTACTAAGG         | ATGGCCACGATTATGTCTCC          |
| RAB7B                       | CTCATTATCGTCGGAGCCATTG      | AGTGTGGTCTGGTATTCCCTCATA      |
| S100A7                      | AGACGTGATGACAAGATTGAC       | TGTCTTTTTTCTCAAAGACGTC        |
| S100A7 Proximal<br>Enhancer | GCGTGCGGGGGAATATAAGA        | CGCATAAATATACCCAGAGTGTT<br>GT |
| S100A8                      | GGGATGACCTGAAGAAATTGCT<br>A | TGTTGATATCCAACCTTTGAACC<br>A  |
| S100A9                      | GTGCGAAAAGATCTGCAAAATT<br>T | GGTCCCATGATGTGTTCTATGA        |
| SE_35880<br>(GH01J151986)   | AAGTATGGGAACCAGCAGGC        | CCCATATGAGGGATGGGGGA          |
| SE_36040<br>(GH01J153561)   | GAGTTGTACGGAATGGCCCC        | GTCACTGCTTTGGATGTCCG          |
| SPRR2E                      | CAGGTGGAGACTGAGAAAGGA<br>A  | TTGATGGTTCACAGGGACAG          |
| SPRR3                       | AGCAGGTCCAGCATCCTTTGA       | CTCCTTGGTTGTGGGAACAAAT        |
| TP63                        | TCCTCAGGGAGCTGTTATCC        | ATTCACGGCTCAGCTCATGG          |

**Appendix Table S3: Recombinant DNA**

| Recombinant DNA               |                                      |                               |
|-------------------------------|--------------------------------------|-------------------------------|
| 8xGTIIIC-luciferase           | A gift from Kunliang Guan (Addgene)  | Cat# 34615                    |
| CTGF- Promoter_pGL3           | A gift from Chunling Yi              |                               |
| pRL-TK                        | Promega                              | Cat# E2241                    |
| NCOA3-pLX304                  | DNASU                                | Cat# HsCD00440252             |
| pCDH-EF1-FHC                  | A gift from Richard Wood (Addgene)   | Cat# 64874                    |
| pCMV-VSVG                     | A gift from Bob Weinberg (Addgene)   | Cat# 8454                     |
| pLKO.1 AIB1#1 (AO) shRNA      | Sigma-Aldrich (Discontinued)         | 5'TGGTGAATCGAGACGGAAACA<br>3' |
| pLKO.1 AIB1#2 (19703) shRNA   | Sigma-Aldrich                        | Cat# TRCN0000019703           |
| pLKO.1 ANCO1#1 (140052) shRNA | Sigma-Aldrich                        | Cat# TRCN0000140052           |
| pLKO.1 ANCO1#2 (344174) shRNA | Sigma-Aldrich                        | Cat# TRCN0000344174           |
| pLKO.1 GFP shRNA              | A gift from David Sabatini (Addgene) | Cat# 30323                    |
| pLKO.1 Luciferase shRNA       | Sigma-Aldrich                        | Cat# SHC007                   |
| pVSV-G                        | A gift from Bob Weinberg (Addgene)   | Cat# 8454                     |
| pFIV-34N                      | System Biosciences                   | Cat# LV100A-1                 |
| pUMVC                         | A gift from Bob Weinberg (Addgene)   | Cat# 8449                     |

|                    |                                        |            |
|--------------------|----------------------------------------|------------|
| TEAD4 pCDH-EF1-FHC | This Study                             |            |
| YAP-pQCXIH         | A gift from Kunliang Guan<br>(Addgene) | Cat# 33091 |
| YAP5SA-pQCXIH      | A gift from Kunliang Guan<br>(Addgene) | Cat# 33093 |
| YAPS94A-pQCXIH     | A gift from Kunliang Guan<br>(Addgene) | Cat# 33094 |

**Appendix Table S4: List of data sources utilized in this manuscript from the public domain.**

| <b>Figure Panel</b> | <b>Data Set</b>                    | <b>Accession Number</b> |
|---------------------|------------------------------------|-------------------------|
| 1D, 1F              | MCF7 AIB1 ChIP-seq                 | GSE105740               |
| 1D                  | MCF7 TEAD4 ChIP-seq                | GSE32465                |
| 1E                  | MCF10A H3K4me3 ChIP-seq            | GSE85158                |
| 1E                  | MCF10A H3K4me1 ChIP-seq            | GSE85158                |
| 1E                  | MCF10A H3K27Ac ChIP-seq            | GSE85158                |
| 1E                  | MCF7 H3K4me3 ChIP-seq              | GSE96506                |
| 1E                  | MCF7 H3K4me1 ChIP-seq              | GSE86714                |
| 1E                  | MCF7 H3K9me3 ChIP-seq              | GSE96517                |
| 1E                  | MCF7 H3K27me3 ChIP-seq             | GSE96363                |
| 1E                  | MCF7 H3K27Ac ChIP-seq              | GSE96352                |
| EV2C-D; EV3J-K      | MCF10A YAP v Vector RNA-seq        | GSE70506                |
| 2F, EV3O            | MCF7 TEAD4 ChIP-seq                | GSE32465                |
| 2F, EV3O            | A549 TEAD4 ChIP-seq                | GSE32465                |
| 2F, EV3O            | MDA-MB-231 TEAD4 ChIP-seq          | GSE66081                |
| 3D                  | DCIS Xenograft Progression RNA-seq | GSE130903               |
